# Supplementary material
Source: MDPI journal article supplement (https://www.mdpi.com/2410-3888/9/3/96)
Supplement: s1 [file s1]

## Supplementary materials

**Table S1**

Water quality of three habitats.

| Index            | The WP group | The OP group | The IP group |
|------------------|--------------|--------------|--------------|
| Temperature (°C) | 29-30        | 28-31        | 29-31        |
| Salinity (‰)     | 31-32        | 29-31        | 31-32        |
| DO (mg/L)        | 6.4-7.6      | 4.8-6.0      | 6.0-6.5      |
| pH               | 8.1-8.3      | 7.9-8.2      | 7.6-8.0      |

WP, wild population; OP, outdoor pond; IP, indoor pond.

**Table S2**

The sequencing data of intestinal microbial after filtering.

| Group | Raw reads | Clean reads | OTUs |
|-------|-----------|-------------|------|
| WP1   | 99126     | 67089       | 272  |
| WP2   | 107863    | 72162       | 275  |
| WP3   | 84173     | 52675       | 256  |
| OP1   | 91691     | 59227       | 273  |
| OP2   | 91265     | 57345       | 299  |
| OP3   | 167638    | 131992      | 313  |
| IP1   | 125975    | 85422       | 435  |
| IP2   | 138905    | 93503       | 405  |
| IP3   | 118057    | 80748       | 350  |

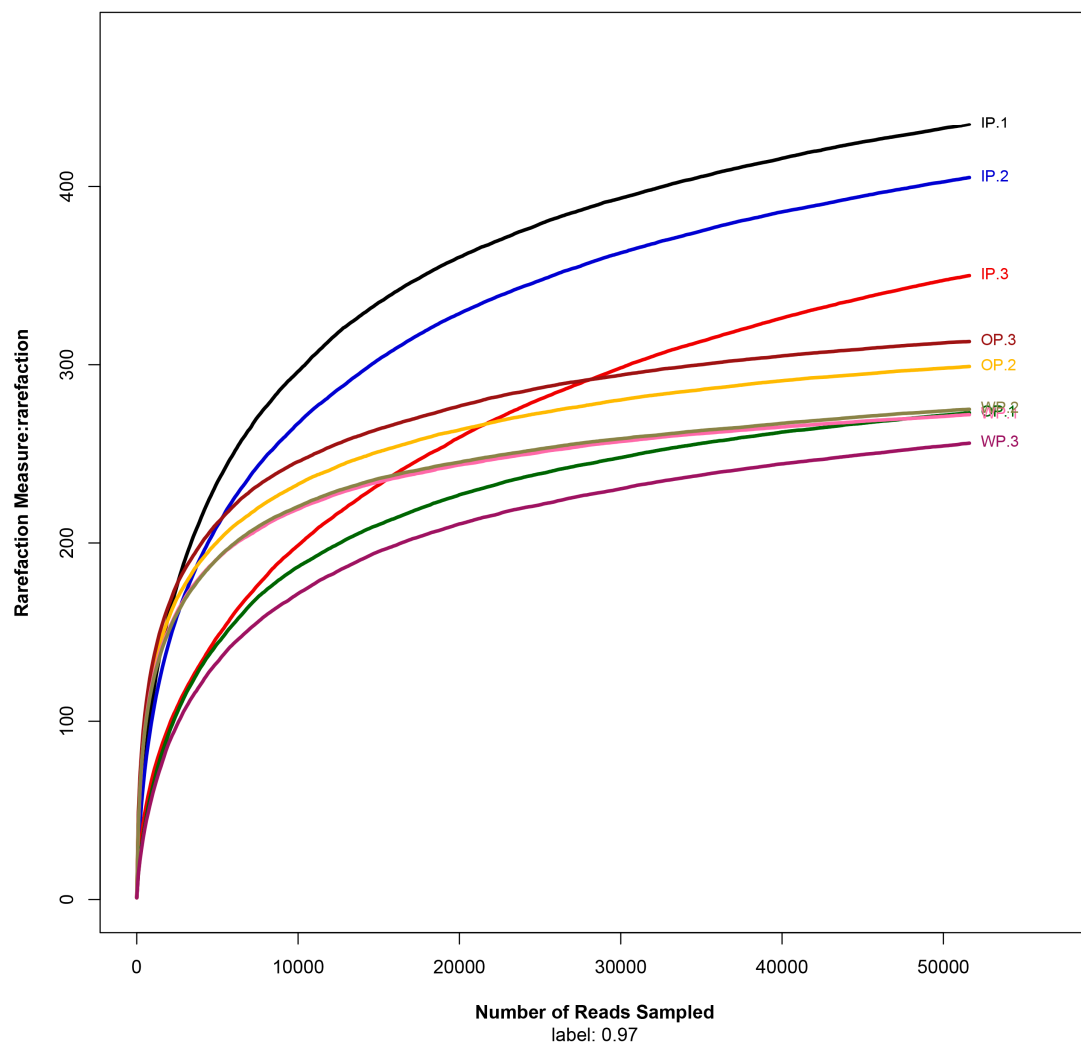

**Fig. S1.** The sequencing rarefaction curve of intestinal microbial.

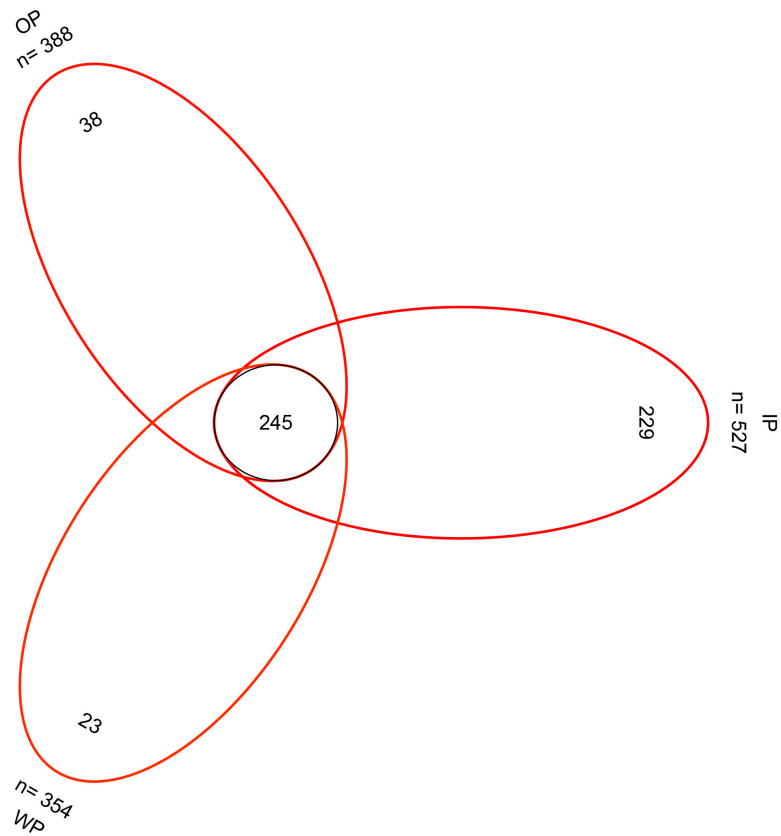

**Fig. S2.** The Venn analysis of the OTUs of intestinal microbial communities in *S. oramin* across three different habitats.

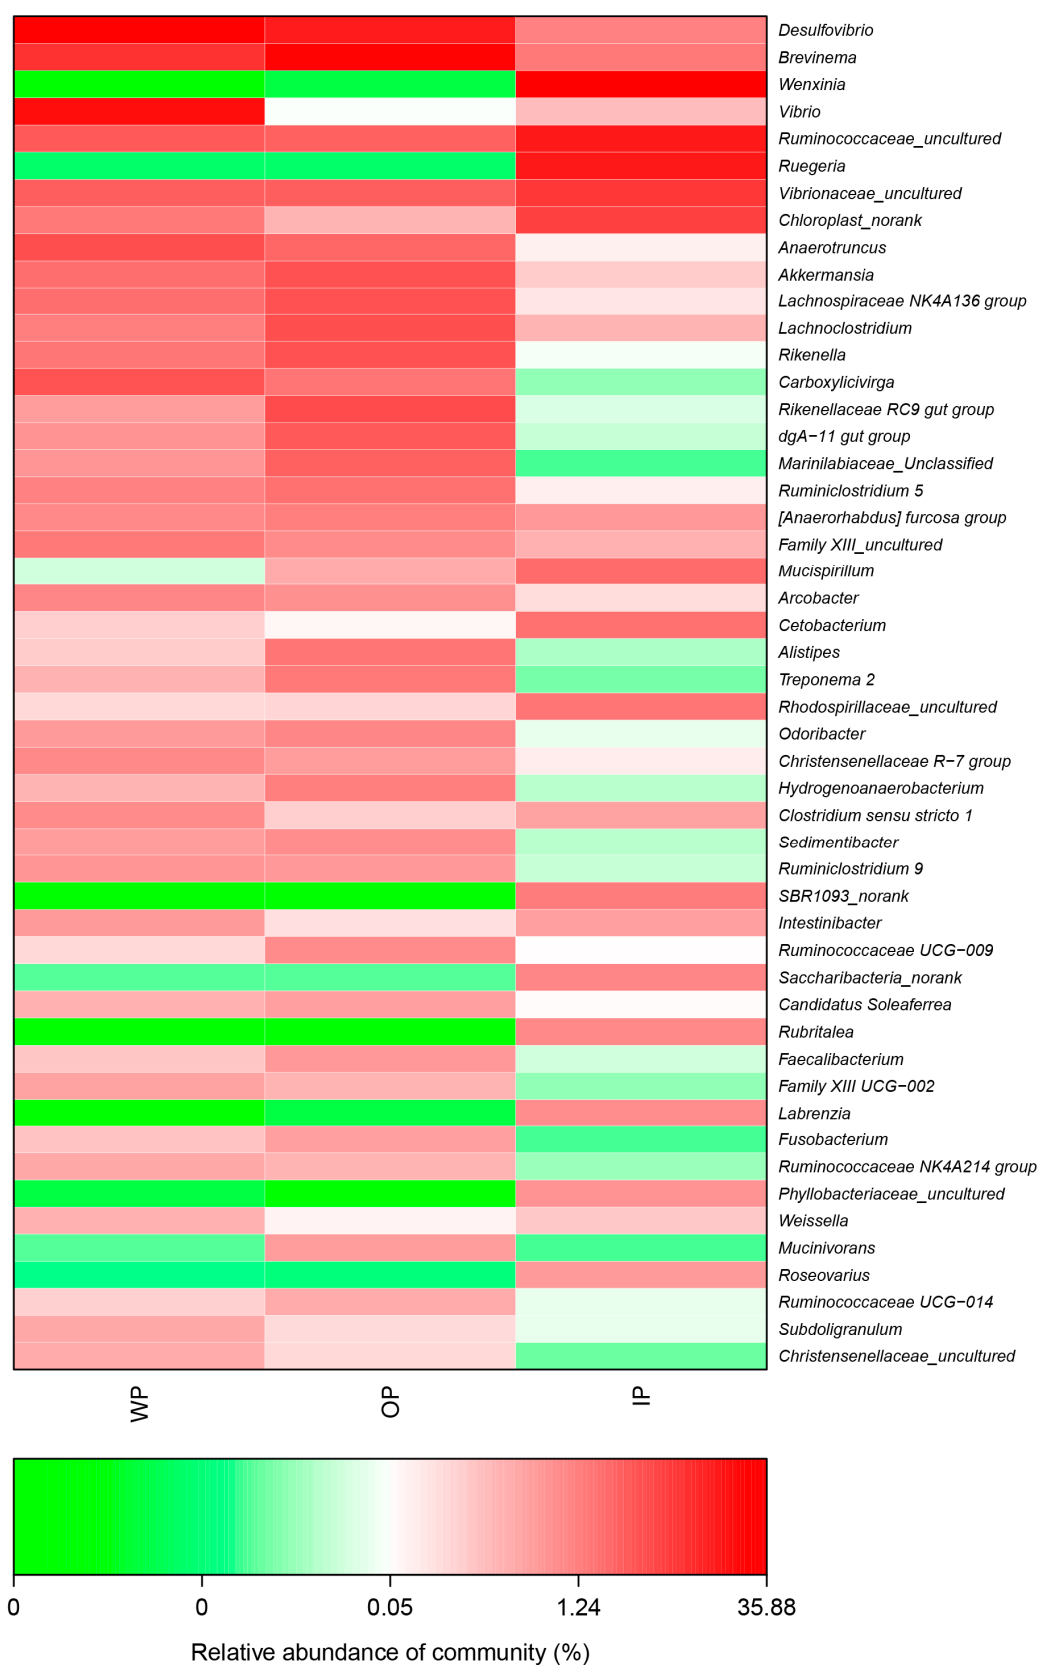

**Fig. S3.** Heatmap of the relative abundance of the top 50 intestinal bacterial genus in *S. oramin* across three different habitats.
